# Supplementary material
Source: HighWire-hosted journal article supplement (https://www.jrheum.org/highwire/filestream/31211/field_highwire_adjunct_files/0/160066DataSuppl.pdf)
Supplement: 160066DataSuppl.pdf [file 160066DataSuppl.pdf]

## **ONLINE SUPPLEMENT**

### **Corticosteroid maintenance therapy**

Corticosteroid maintenance therapy may also influence serial ANCA measurements. To analyse this, we compared the risk for a relapse after an ANCA rise in patients who were still on corticosteroids versus the risk in patients who were no longer taking corticosteroids. Thirty-two patients were still on corticosteroids, of whom 23 (71.9%) relapsed. The remaining 28 patients were no longer on corticosteroids, of whom 13 (46.4%) relapsed. No difference in time to relapse was observed between the two groups ( $X^2=3.082$ , log-rank  $p=0.079$ ).

In particular, a withdrawal of corticosteroid therapy may provoke an ANCA rise. It can be hypothesized that these rises may not be followed by a relapse and are therefore false positive ANCA rises. In order to investigate this, we divided the patients who were no longer taking corticosteroids in two subgroups: patients who were weaned off corticosteroids in the previous 3 months and patients who were off corticosteroids for longer than 3 months. Twenty patients were no longer taking corticosteroids for longer than 3 months, of whom 8 (46.4%) relapsed. The remaining 8 patients were weaned off corticosteroids in the previous 3 months, of whom 5 (62.5%) relapsed. No difference in time to relapse was observed between the two groups ( $X^2=0.299$ , log-rank  $p=0.585$ ).

### **Risk factors of a major and renal relapse**

In an additional analysis, we wanted to verify that the risk factors for a relapse were also predictive for a major relapse. Hereto, we limited the endpoint of the multivariate survival analysis to a major relapse ( $n=20$ ) and we censored the patients who remained in remission and patients who experienced a minor relapse during follow-up. An extended rise and an ANCA rise during the fall season remained significant risk factors for a major relapse, while induction regimen lacking CYC/RTX was no longer predictive of a major relapse (Supplementary Table 1).

We performed the same analysis for renal relapses ( $n=27$ ), wherein we censored the patients who remained in remission and patients who experienced a non-renal relapse during follow-up. An extended rise and induction regimen lacking CYC/RTX remained significant risk factors for a renal relapse, while an ANCA rise during the fall season was no longer predictive of a renal relapse (Supplementary Table 2).

**Supplementary Table 1.** Results of the multivariate analysis of risk factors for a **major** relapse from the time of an ANCA rise (patients are censored at a minor relapse). Hazard ratios are shown with 95% confidence intervals.

| Risk factor for a major relapse   | Multivariate |                  |              |
|-----------------------------------|--------------|------------------|--------------|
|                                   | HR           | 95%-CI           | p            |
| Induction regimen lacking CYC/RTX | 2.06         | (0.66 - 6.42)    | 0.215        |
| Extended rise                     | 7.24         | (1.99 - 26.36)   | <b>0.003</b> |
| Season                            |              |                  |              |
| Spring                            |              | <i>Reference</i> |              |
| Summer                            | 2.43         | (0.70 - 8.44)    | 0.164        |
| Fall                              | 4.31         | (1.17 - 15.86)   | <b>0.028</b> |
| Winter                            | 0.83         | (0.19 - 3.54)    | 0.800        |

**Supplementary Table 2.** Results of the multivariate analysis of risk factors for a **renal** relapse from the time of an ANCA rise (patients are censored at a non-renal relapse). Hazard ratios are shown with 95% confidence intervals.

| Risk factor for a renal relapse   | Multivariate |                  |              |
|-----------------------------------|--------------|------------------|--------------|
|                                   | HR           | 95%-CI           | p            |
| Induction regimen lacking CYC/RTX | 3.61         | (1.49 - 8.72)    | <b>0.004</b> |
| Extended rise                     | 3.72         | (1.37 - 10.10)   | <b>0.010</b> |
| Season                            |              |                  |              |
| Spring                            |              | <i>Reference</i> |              |
| Summer                            | 1.82         | (0.60 - 5.56)    | 0.292        |
| Fall                              | 2.66         | (0.88 - 8.09)    | 0.084        |
| Winter                            | 1.32         | (1.49 - 8.72)    | 0.627        |
